# Supplementary material for: 10D1F, an Anti-HER3 Antibody That Uniquely Blocks the Receptor Heterodimerization Interface, Potently Inhibits Tumor Growth Across a Broad Panel of Tumor Models
Source: Oxford University Press journal article supplement (doi:10.1158/1535-7163.mct-19-0515), 2020-01-08
Supplement: 15357163mct190515-sup-222339_2_supp_5773011_pxrf7l.xlsx [file 15357163mct190515-sup-222339_2_supp_5773011_pxrf7l.xlsx]

## Sheet: Sheet1
Supplemental Table 1 - Summary of the published functional mechanisms of action for anti-HER3 neutralizing antibodies in development
HER3 Targeted Monoclonal Antibodies in the Clinic
Mechanism of Action	mAB	Company	Fc Format	Published Binding Region	Reference
Class 1 mABs - Inhibit Ligand Binding	Seribantumab (MM-121)	Merrimack	IgG2	domain I	12
	Patritumab (U3–1287/AMG888)	Amgen	IgG1	ligand binding site
	Lumretuzumab (RG-7116)	Roche	IgG1	domain I
	AV-203	Aveo Oncology	IgG1	ligand binding site
	GSK2849330	Glaxo Smith Kline	IgG1	domain III
	REGN1400	Regeneron	IgG4	ligand binding site
Class 2 mABs - Inhibit Conformational Change	Elgemtumab (LJM-716)	Novartis	IgG1	interface between domain II and IV
	KTN3379	Koltan Pharmaceuticals, Medimmune	IgG1	between domain II and III
