# Supplementary material for: 10D1F, an Anti-HER3 Antibody That Uniquely Blocks the Receptor Heterodimerization Interface, Potently Inhibits Tumor Growth Across a Broad Panel of Tumor Models
Source: Oxford University Press journal article supplement (doi:10.1158/1535-7163.mct-19-0515), 2020-01-08
Supplement: 15357163mct190515-sup-222339_2_supp_5773012_pxrf7r.xlsx [file 15357163mct190515-sup-222339_2_supp_5773012_pxrf7r.xlsx]

## Sheet: Sheet1 
Supplemental Table 3 - Toxicological data showing no adverse effects of 10D1F on the indicated hematological and biochemistry parameters in multiple rodent models
Model	Treatment Arm	Dose	Time	Hematological parameters										Biochemistry
		(mg/kg)	(hrs)	Red Blood Cell			Anemia Parameters			White Blood Cell				Liver (U/L)				Kidney (mg/dL)		Pancreas		Electrolytes
				RBC Count (10^12/L)	Hemoglobin (g/dl)	Hematocrit (%)	MCV (fml)	MCH (pg)	MCHC (g/dl)	WBC Count (10^9/ L)	Lymphocyte Count (10^9/ L)	Monocyte Count (10^9/ L)	Neutrophil Count (10^9/ L)	ALT	ALP	ALB	TP	CREA	BUN	GLU (mg/dL)	AMY (U/L)	NA (meq/L)	K (meq/L)	P (mg/dL)	CA (mg/dL)
				Average	Average	Average	Average	Average	Average	Average	Average	Average	Average	Average	Average	Average	Average	Average	Average	Average	Average	Average	Average	Average	Average
NCr nude mice	Vehicle	0	96	10.59	17.075	52.93	50	16.125	32.25	7.43	5.58	0.3	1.55	25	104.5	3.25	5.75	0.25	13	128.75	959.75	144.75	7.35	6.83	10.35
	10D1F	10	336	10.74	17.23	55.97	52	16.07	30.87	9.3	7.06	0.14	2.1	22.67	109.33	3.26	5.33	0.3	11.33	91	904.67	143	8.07	6.67	10.3
		25		10.55	16.97	53.37	50.33	16.1	31.87	8	5.94	0.31	1.74	48.67	121	3.2	5.33	0.23	12.33	109.67	938	144.33	7.3	6.5	10.77
		100		10.16	15.9	51.2	50.33	15.63	31.1	6.92	5.19	0.41	1.31	27	101.33	3.43	5.86	0.23	11	119	862	148.33	7.47	5.53	10.57
		250		10.32	16.97	52.13	50.33	16.43	32.53	3.92	2.88	0.29	0.75	53	101.33	3.3	5.46	0.27	16.33	139	1407.67	146.67	7.83	5.33	10.3
Sprague dawley rats	Vehicle	0	0	5.30333	13.2067	54.84	59.3333	17.2	28.6333	13.22	11.5	1.43333	3.08	40.3333	307	4.8	6.76667	0.4	10	119.333	514.333	138.333	6.86667	6.86667	11.5
			6	4.54667	8.96667	51.3833	60.6667	16.7667	29.9	8.09	11.5	1.20333	2.57333	44.3333	274.333	5.03333	6.36667	0.366667	12	141	537.333	142.667	5.73333	5	11.5
			24	5.84	13.5867	39.5133	56.6667	18.0333	30.7667	9.81667	11.5333	0.893333	2.08	46	216.667	3.86667	6.56667	0.4	12.3333	130.333	594.333	139.667	5.36667	7.43333	11.5333
			96	7.75667	10.8667	52.4067	60.6667	17.6	30.2333	7.60667	11.6	0.966667	1.96667	54.6667	236.667	3.93333	6.63333	0.4	12	117	503.333	141.333	5.9	7.16667	11.6
			168	5.81333	11.4933	42.3067	59.6667	17.2667	29.9	11.0233	11.3	1.23667	2.05	47	206	4.7	6.9	0.4	10.6667	122.667	562.667	144	7.1	6.93333	11.3
			336	7.50667	16.4133	49.2333	60.6667	16.8333	29.0333	9.66667	11.1667	0.643333	2.06333	40	275	4.96667	6.53333	0.333333	13.3333	135.667	643	139.667	6.26667	7.8	11.1667
	10D1F	10	0	8.03	14.335	51.43	60.25	18	29.85	9.595	11.225	0.3325	2.4	51.75	252.25	4.55	6.175	0.325	12.5	124.5	509.75	142.25	5.65	7.425	11.225
			6	8.9725	14.845	50.845	58.75	17.525	29.575	8.2575	11	0.245	4.0475	46.25	235.5	4.475	6.55	0.375	11.75	102	494.5	140	7.525	9.6	11
			24	8.0975	15.125	48.9525	60.75	18.5	30.8	12.15	11.15	0.6125	2.3675	40.75	247.75	4.05	6.475	0.35	10.25	123.25	535.5	140	7.625	7.8	11.15
			96	7.4875	13.35	45.465	60.5	17.65	29.05	10.8675	11.95	0.6725	1.8675	46	259.75	4.55	6.825	0.375	12.5	79.75	636.5	140.25	7.125	8.5	11.95
			168	8.195	12.9	43.0425	62.25	18.2	29.25	9.6875	11.125	0.6975	1.675	41	336.5	4.925	6.125	0.3	12	143.75	630.25	136.75	5.275	6.175	11.125
			336	8.4725	15.75	52.285	61.5	18.575	30.1	11.69	11.2	0.92	2.0625	38	310	5.25	6.65	0.375	13.25	110.75	620.75	137.5	5.9	6	11.2
	10D1F	25	0	8.7475	13.8375	51.76	59.75	18.2	31.35	11.7975	11.125	0.825	2.34	46.75	211.75	4.525	6.075	0.35	13.5	127	554	138.75	5.3	6.975	11.125
			6	7.45	13.75	43.49	58.25	18.325	31.425	7.1575	10.9	0.48	2.9125	41.5	186	4.85	6.425	0.475	12.75	101.5	539	136.75	6.85	8.8	10.9
			24	8.2425	13.925	49.7925	60.5	16.8	27.825	10.7975	11.475	0.75	1.76	34	243.25	4.175	6.825	0.35	11.75	134	548	141.5	7.725	7.9	11.475
			96	6.9625	12.825	42.505	61	18.4	30.15	11.7675	11.475	0.8025	1.78	34.25	203	4.8	6.75	0.6	11.5	104.5	564.75	137	6.3	7.5	11.475
			168	7.215	13.35	45.0425	62.5	18.475	29.6	10.73	11.25	0.6825	1.4975	44.25	258.5	5.425	6.6	0.375	12	121	580	137.75	5.6	7.125	11.25
			336	9.205	15.35	55.535	61.25	17.15	27.975	12.5325	11.3	1.025	2.1975	33	363.25	5.375	6.7	0.45	12	109	642.75	137.75	5.75	6.575	11.3
	10D1F	100	0	9.215	15.925	55.005	60.75	17.925	29.7	11.1625	11.25	0.64	2.285	53.25	234.25	4.65	6.75	0.35	12.25	140.5	546.75	141.25	6.25	6.025	11.25
			6	7.62	14.25	44.7225	58.75	18.7	31.75	6.91	10.9	0.3675	2.6925	63.75	211.5	4.375	6.85	0.425	12	114.25	516	139.75	7.325	8.975	10.9
			24	7.625	14.35	46.825	61.75	18.9	30.575	10.975	11.65	0.7975	2.4975	40	230.25	4.15	6.925	0.375	10	135.75	572.5	140.25	6.975	8.025	11.65
			96	7.0525	16.225	48.5775	61.5	19.2	31.3	8.69	11.675	0.5925	1.0975	36.75	215.75	4.4	6.85	0.45	11	111.5	575.25	139	6.425	8	11.675
			168	7.74	14.75	49.845	64.5	19.1	29.6	12.4	11.525	0.8375	2.65	39.5	374.5	5.275	6.8	0.375	11.75	114.75	592.5	137.25	5.475	6.775	11.525
			336	8.7575	16.9	54.415	62	19.275	31.025	14.835	11.6	0.64	2.5125	42.25	522	5	6.875	0.475	9.75	106	754.5	136.5	5.825	7.375	11.6
	10D1F	250	0	9.445	17.55	56.3325	60	18.625	31.2	12.3825	11.375	1.285	2.1975	46.25	268.25	4.75	6.3	0.375	10.5	111.75	558.75	138.5	6.225	8.075	11.375
			6	10.515	13.75	57.64	56.25	17.675	29.175	11.8525	10.975	0.5	3.68	46.25	279.25	5.025	6.825	0.325	13.25	137.25	543.75	140.25	6.675	8.45	10.975
			24	8.175	15.425	50.5175	62	18.9	30.55	11.0125	11.8	0.92	2.3425	32.75	283	4.35	7.7	0.325	9.875	131.75	634.75	140.25	7.225	8.25	11.8
			96	8.1625	15.65	48.76	59.5	19.175	32.15	11.9	11.65	0.8425	2.05	33.5	245	4.625	7.15	0.45	10.25	120	618.25	140.25	7.05	8.675	11.65
			168	7.0625	13.625	45.5875	64.5	19.35	29.9	10.485	11.4	0.575	2.095	40	355.25	5.175	6.65	0.45	11.5	140.75	614.75	136.25	5.03333	7.075	11.4
			336	7.1725	13.6	44.96	62.5	18.825	30.075	12.755	11.175	0.9475	2.0275	93	601.5	4.825	6.45	0.325	8.75	120	772.5	137	5.4	7.35	11.175
