# Supplementary material for: 10D1F, an Anti-HER3 Antibody That Uniquely Blocks the Receptor Heterodimerization Interface, Potently Inhibits Tumor Growth Across a Broad Panel of Tumor Models
Source: Oxford University Press journal article supplement (doi:10.1158/1535-7163.mct-19-0515), 2020-01-08
Supplement: 15357163mct190515-sup-222339_2_supp_5773013_pxrf7n.xlsx [file 15357163mct190515-sup-222339_2_supp_5773013_pxrf7n.xlsx]

## Sheet: Sheet1
Supplemental Table 2 - Summary of protein and gene expression data of HER family molecules, and their ligands, for the cancer cell lines used in this study
Solid Tumor	Cell Line	NRG required	mRNA Expression						Protein Expression			Mutation					Notes	Reference
			(Data from CCLE)						(Data based on FACS)			(Data from CCLE)
			EGFR	HER2	HER3	HER4	EGF	NRG1	EGFR	HER2	HER3	PTEN	KRAS	P53	BRAF	CDKN2A
Gastric	N87	No	7.08	13.18	9.67	3.83	4.08	4.22	358	618	5.6	_	_	p.R248Q	_	_	HER2 driven – high HER2	13
																	NRG expression low
																	HER2 driven activation
																	HER2:HER3 signaling
	SNU16	No	6.88	7.8	11.06	4.04	3.78	4.26	13.6	28.3	1.9	_	p.G12D	p.Y205F p.G187R		_	NRG protein low (published)	14
															p.GAGA30del		NRG expression low
																	HER2 driven activation
																	HER2:HER3 signaling
Head and Neck	FaDu	Yes	7.99	7.36	8.35	4.01	3.89	4.96	65.1	11.6	1.5	_	_	p.R248L	_		NRG protein high (published)	14
																Splice Site	EGFR protein high
																	NRG driven activation
																	EGFR:HER3 signaling
Lung	A549	Yes	7.29	6.79	5.18	3.85	4.2	8.81	19	17.7	7.4	_	p.G12S	_	_	_	NRG expression high	14
																	NRG protein high (published)
																	NRG driven activation
																	EGFR:HER3 + HER2:HER3 signaling
	HCC95*	Yes	7.33	7.06	7.31	3.85	4.19	11.24	101	44.5	8.2	_	_	p.G334fs	_	_	NRG expression high	15
																	EGFR protein high
																	NRG driven activation
																	EGFR:HER3 signaling
Ovarian	OvCAR8	Partially	6.19	6.72	8.24	3.86	4.72	6.65	44.5	131	4.7	_	p.P121H	Splice Site			NRG expression high	16
															_	_	HER2 protein high
																	Both NRG and HER2 driven HER2:HER3 signaling
Renal	ACHN	Partially	7.81	6.78	6.32	3.8	4.66	8.04	93.6	67.5	4	_	_	_	_	_	NRG expression high	17
																	EGFR protein high
																	Both NRG and EGFR driven
																	EGFR:HER3 signaling
Thyroid	BCPAP	Unknown	8.89	6.89	6.04	4.02	5.71	5.06	99.9	98.2	83.6	_	_	p.D259Y	p.V600E	_	BRAFV600E mutation	18
